# Supplementary material for: Structural Characterization of a Low Molecular Weight HG-Type Pectin From Gougunao Green Tea
Source: PubMed Central journal article supplement (PMC9044067; doi:10.3389/fnut.2022.878249), 2022-04-13
Supplement: Data_Sheet_1.pdf [file Data_Sheet_1.pdf]

## Supplementary materials

**Table S1.** Yield and uronic acid content of GPS and purified fractions #.

|       | Yield (%) | Uronic acid (%)        |
|-------|-----------|------------------------|
| GPS   | 3.18 *    | 45.9±1.5 <sup>a</sup>  |
| GPS1  | 7.0 **    | 55.1±1.2 <sup>b</sup>  |
| GPS1a | 5.6 ***   | 22.3±0.5 <sup>ef</sup> |
| GPS1b | 39.3 ***  | 77.6±1.2 <sup>g</sup>  |
| GPS2  | 38.1 **   | 70.2±0.8 <sup>c</sup>  |
| GPS2a | 2.3 ***   | 21.0±0.4 <sup>e</sup>  |
| GPS2b | 38.4 ***  | 81.2±1.3 <sup>g</sup>  |
| GPS3  | 15.2 **   | 47.9±0.7 <sup>a</sup>  |
| GPS3a | 19.5 ***  | 38.0±0.7 <sup>h</sup>  |
| GPS3b | 17.9 ***  | 61.1±2.0 <sup>i</sup>  |
| GPS4  | 15.4 **   | 14.0±0.8 <sup>d</sup>  |
| GPS4a | 9.3 ***   | 24.8±1.9 <sup>f</sup>  |
| GPS4b | 36.9 ***  | 7.3±0.5 <sup>j</sup>   |

# Data are expressed as mean ± SD (n = 3) except the yields.

\*: calculated based on the dry weight of tea leaves.

\*\*: calculated based on the weight of GPS.

\*\*\*: calculated based on the weight of DEAE purified fractions.

<sup>a-j</sup> Values followed by the different letter in the same column are significantly different (p < 0.05).

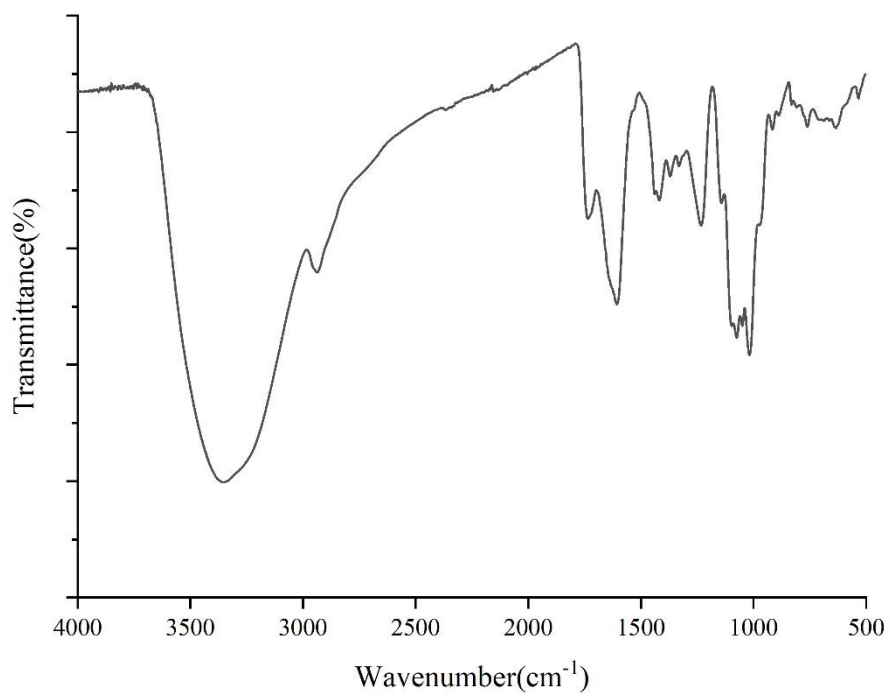

**Figure S1.** IR spectrum of GPS.

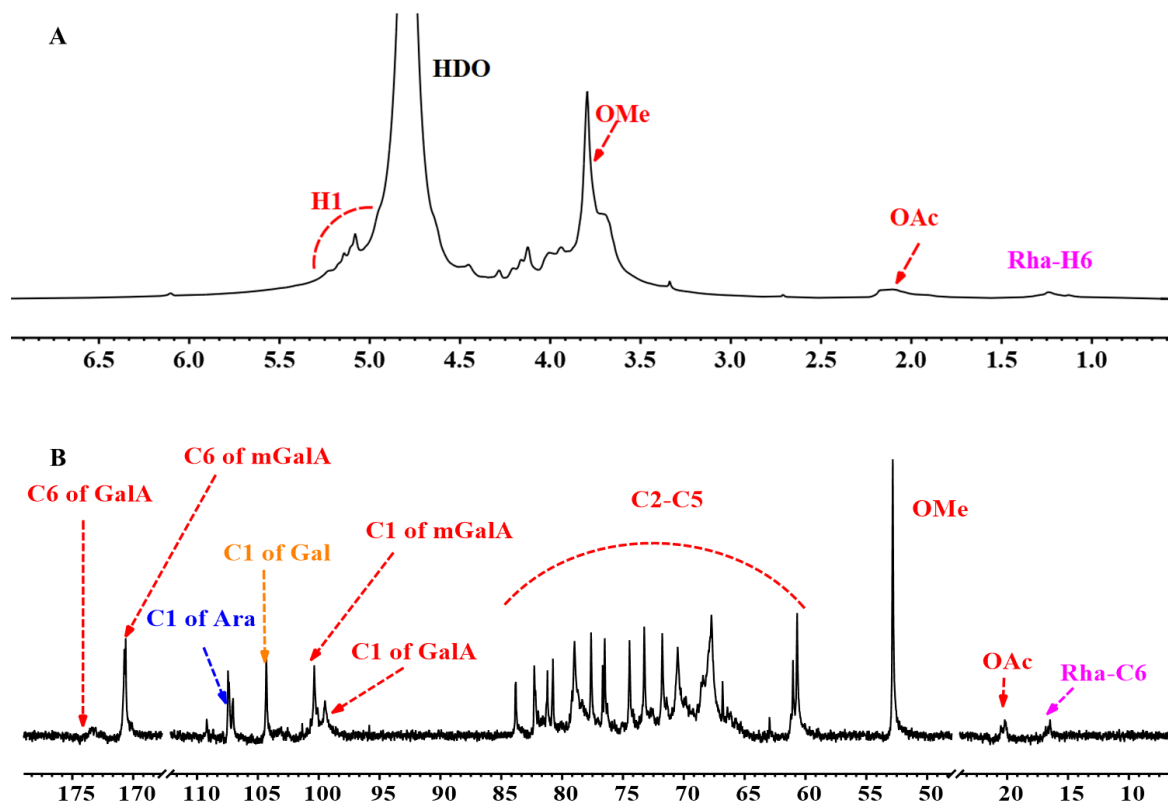

**Figure S2.** 1D NMR spectra of GPS. A. <sup>1</sup>H NMR spectrum; B. <sup>13</sup>C NMR spectrum.

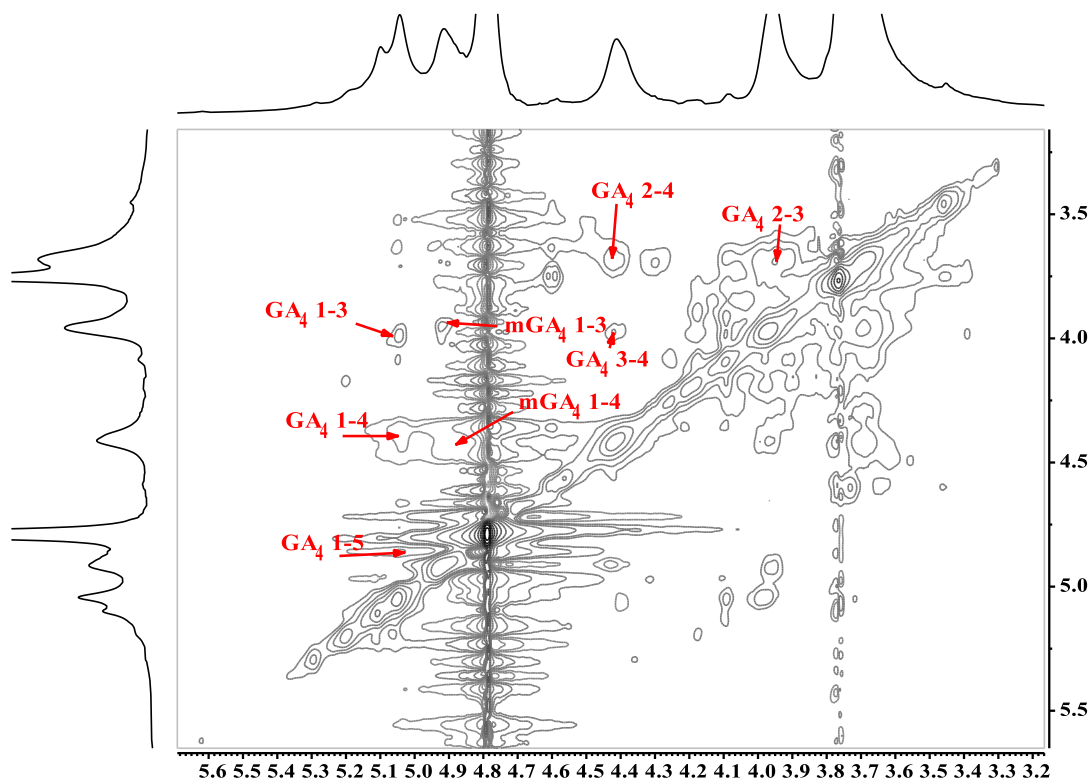

Figure S3. TOSCY spectrum of GPS2b.
